# Supplementary material for: Mass transport and structure of liquid n-alkane mixtures in the vicinity of α-quartz substrates
Source: Royal Society of Chemistry journal article supplement (doi:10.1039/c6ra22398b), 2016-01-01
Supplement: c6ra22398b1.pdf [file c6ra22398b1.pdf]

## Supporting information

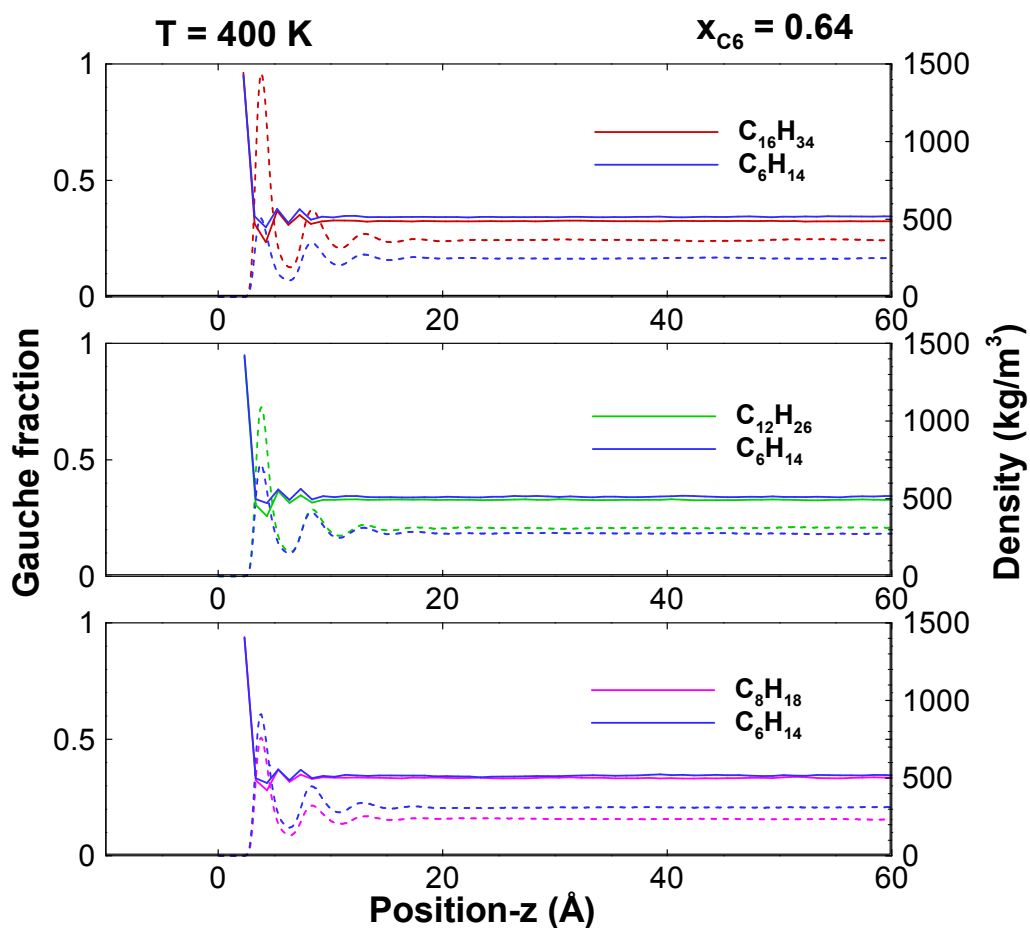

Supporting Figure 1. Gauche fraction as a function of distance along  $z$ -axis for hexane-hexadecane, hexane-dodecane, and hexane-octane mixtures at  $T = 400$  K and  $x_{C_6} = 0.64$ . Density distributions are depicted in dashed lines.

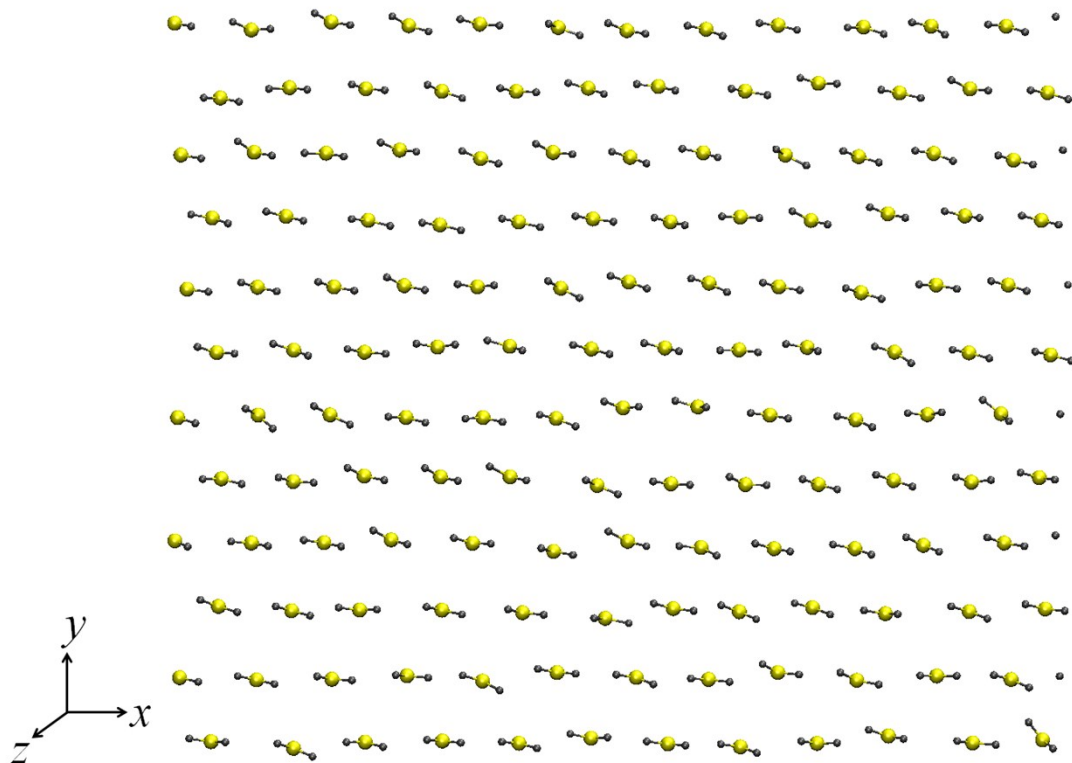

Supporting Figure 2. Snapshot of surface silicon and hydrogen atoms for a (001)  $\alpha$ -quartz crystal plane terminated with H-groups.
